# Supplementary material for: Generation mechanism of RANKL+ effector memory B cells: relevance to the pathogenesis of rheumatoid arthritis
Source: PubMed Central journal article supplement (PMC4793760; doi:10.1186/s13075-016-0957-6), 2016-03-16

# Additional file 2: Figure. S1

**A**

No Stim

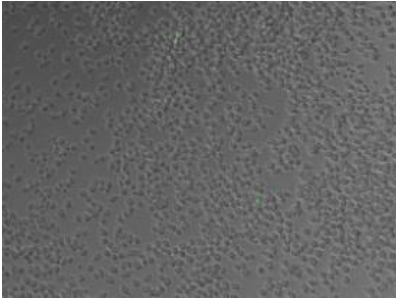

RANKL 5 ng/ml

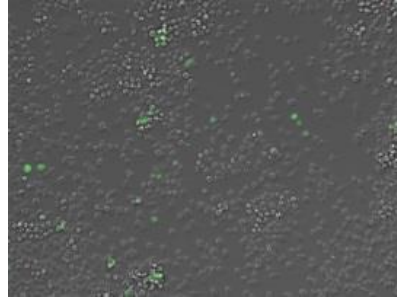

RANKL 50 ng/ml

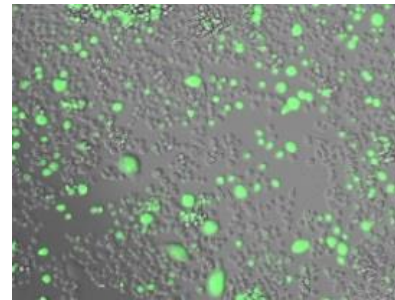

TNF- $\alpha$

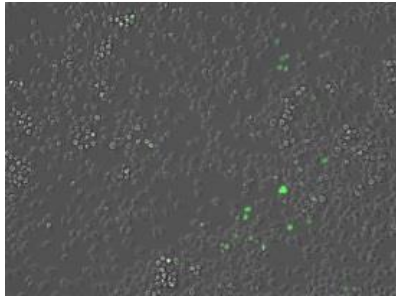

RANKL 5 ng/ml + TNF- $\alpha$

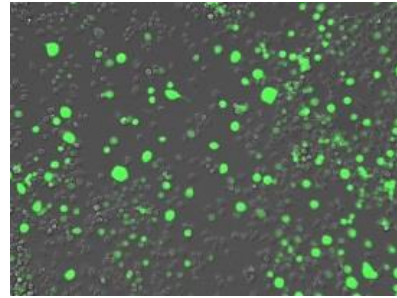

RANKL50 ng/ml + TNF- $\alpha$

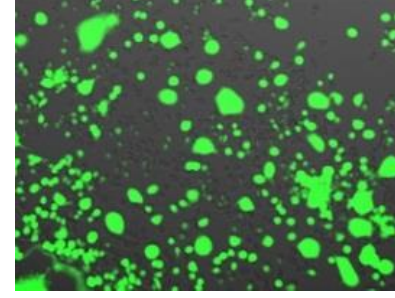

**B**

RANKL 50 ng/ml + TNF- $\alpha$   
+ $\alpha$ RANKL

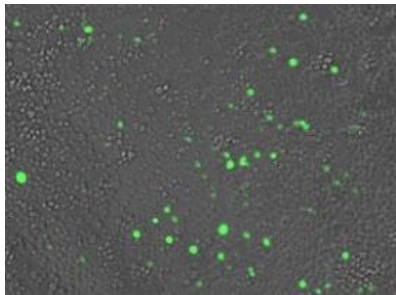

RANKL 50 ng/ml + TNF- $\alpha$   
+OPG

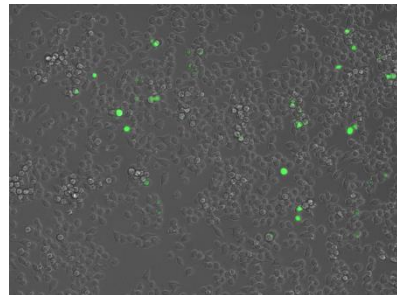

**C**

RANKL 50 ng/ml

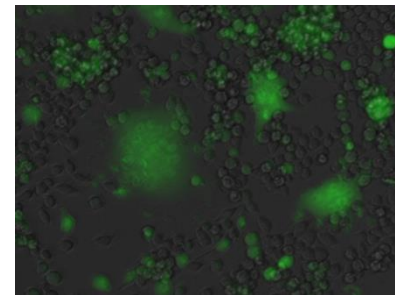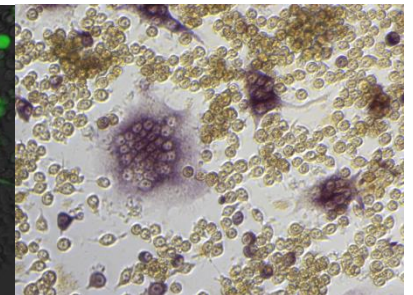

Supplement: 13075_2016_957_MOESM2_ESM.pdf [file 13075_2016_957_MOESM2_ESM.pdf]
