# Supplementary material for: Generation mechanism of RANKL+ effector memory B cells: relevance to the pathogenesis of rheumatoid arthritis
Source: Springer Nature journal article supplement (doi:10.1186/s13075-016-0957-6), 2016-03-16

# Additional file 3: Figure. S2

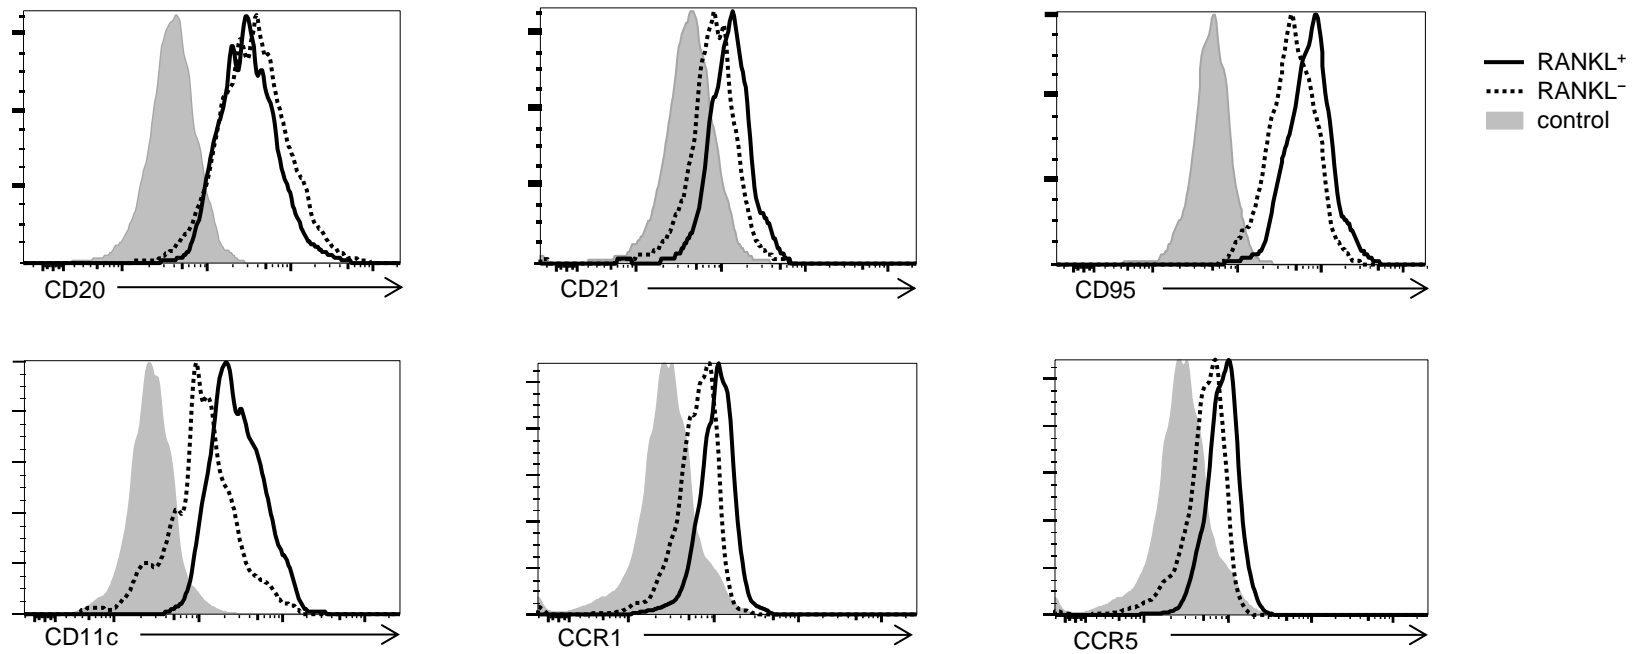

Supplement: MOESM3 [file 9784350]
